# Supplementary material
Source: publisher figshare collection journal article supplement (https://tandf.figshare.com/ndownloader/files/2593555)
Supplement: Supplementary file 1 [file 2593555]

## Sheet: Case-Control associations PNPPP
Supplementary Data 4
Disease	Prot	PNPPP.pval	PNPPP case mean	PNPPP control mean
Cataract	EGFR	5.41e-08	3.82	4.14
Cataract	EN-RAGE	9.17e-07	3.55	2.93
Cataract	CCL3	1.64e-06	2.13	1.73
Cataract	CCL20	5.7e-06	6.64	6.12
Cataract	Cystatin_B	9.54e-06	5.51	5.03
Cataract	Midkine	2.37e-05	3.26	2.96
Cataract	IL-6	2.97e-05	4.24	3.66
Cataract	MMP-12	5.33e-05	8.38	8.04
Diabetes	Amphiregulin	1.23e-06	2.43	2.13
Diabetes	GDF-15	1.11e-05	2.66	2.28
Diabetes	MMP-10	1.33e-05	6.87	6.48
Diabetes	TR-AP	3.88e-05	4.84	4.6
HBP	SPON1	8.7e-18	3.72	3.45
HBP	FGF-23	1.24e-15	2.92	2.51
HBP	t-PA	3.44e-15	4.21	3.78
HBP	CD40	3.93e-14	9.06	8.77
HBP	IL-6	4.03e-13	4.17	3.54
HBP	CCL20	1.36e-12	6.51	6.06
HBP	REN	1.78e-12	8.46	8
HBP	HB-EGF_2	2.84e-11	4.52	4.42
HBP	Prostasin	1.68e-09	6.38	6.15
HBP	IL27-A	3.63e-09	2.35	2.19
HBP	CCL4	4.4e-09	7.84	7.54
HBP	CCL3	1.08e-08	1.87	1.64
HBP	MMP-12	2.14e-08	8.34	8.06
HBP	CXCL16	3.12e-08	4.76	4.59
HBP	Amphiregulin	3.61e-08	2.31	2.1
HBP	PAR-1	3.89e-08	7.25	7.02
HBP	Midkine	1.13e-07	3.28	3.06
HBP	CSTB	2.59e-07	4.86	4.64
HBP	FABP4	1.07e-06	7.53	7.28
HBP	Growth_Hormone	1.27e-06	8.91	8.18
HBP	PlGF	2.1e-06	6.12	5.94
HBP	Adrenomedullin	3.04e-06	4.39	4.19
HBP	EGFR	4.01e-06	3.98	4.14
HBP	GDF-15	4.75e-06	3.37	3.13
HBP	TRAIL-R2	6.84e-06	1.08	0.94
HBP	RETN	9.86e-06	6.9	6.67
HBP	IL-16	1.15e-05	5.16	4.95
HBP	IL-1ra	1.23e-05	3.02	2.82
HBP	Cystatin_B	1.24e-05	5.17	4.96
HBP	Prolactin	3.62e-05	3.88	4.14
HBP	CCL9	4.06e-05	9.04	8.79
HBP	CX3CL1	4.35e-05	6.07	5.92
HBP	U-PAR	6.52e-05	7.52	7.4
MyoCardial	Amphiregulin	2.45e-07	2.49	2.12
MyoCardial	REN	2.1e-06	8.44	8.02
MyoCardial	Midkine	3.37e-06	3.42	3.09
MyoCardial	IL27-A	3.68e-06	3.21	2.99
MyoCardial	CCL3	6.94e-06	2.09	1.72
MyoCardial	GDF-15	7.19e-06	3.01	2.64
MyoCardial	CCL4	1.07e-05	7.88	7.53
MyoCardial	VEGFR-2	1.53e-05	2.79	2.96
MyoCardial	EGFR	2.41e-05	3.92	4.13
MyoCardial	MMP-12	2.53e-05	8.2	7.84
MyoCardial	t-PA	3.4e-05	2.63	2.31
MyoCardial	MMP-10	3.47e-05	6.86	6.51
MyoCardial	HB-EGF_2	5.68e-05	4.53	4.44
MyoCardial	FGF-23	5.87e-05	2.94	2.53
Stroke	Amphiregulin	4.56e-06	2.52	2.13
Stroke	Midkine	1.14e-05	3.57	3.09
Stroke	GDF-15	3.75e-05	3.23	2.76
Stroke	IL-6	6.17e-05	4.37	3.66
Stroke	PlGF	6.66e-05	5.89	5.55
